# Supplementary material for: FtMYB8 from Tartary buckwheat inhibits both anthocyanin/Proanthocyanidin accumulation and marginal Trichome initiation
Source: PubMed Central journal article supplement (PMC6582506; doi:10.1186/s12870-019-1876-x), 2019-06-18
Supplement: 12870_2019_1876_MOESM1_ESM.pdf [file 12870_2019_1876_MOESM1_ESM.pdf]

***FtMYB8* from Tartary buckwheat inhibits both anthocyanin/proanthocyanidin accumulation and marginal trichome initiation**

Yunji Huang<sup>#</sup>, Qi Wu<sup>#</sup>, Shuang Wang, Jiaqi Shi, Qixin Dong, Panfeng Yao, Guannan Shi, Shuangxiu Xu, Renyu Deng, Chenglei Li, Hui Chen, Haixia Zhao<sup>\*</sup>

**Additional file**

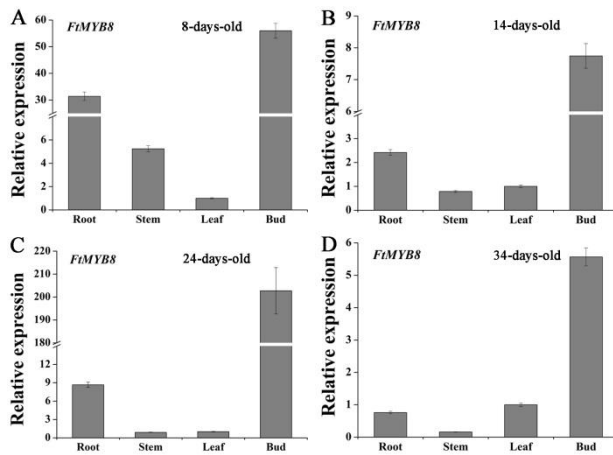

**Figure S1.** Expression of *FtMYB8* during Tartary buckwheat development.

The relative expression of the *FtMYB8* gene was evaluated by the  $2^{-\Delta\Delta CT}$  method. *FtH3* was used as a reference gene. The accumulation of *FtMYB8* mRNA in the leaves was defined as "1" at each developmental stage. Means were calculated from three repeats, and error bars reflect  $\pm$ SDs.

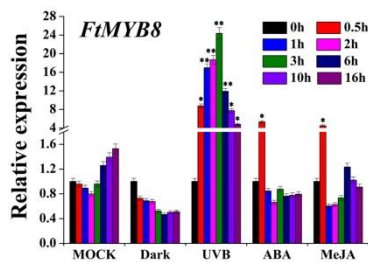

**Figure S2.** Relative expression of *FtMYB8* in Tartary buckwheat seedlings under the influence of environmental factors and hormone treatments.

The relative expression of the *FtMYB8* gene was evaluated by the  $2^{-\Delta\Delta CT}$  method. *FtH3* was used as a reference gene. The level of *FtMYB8* mRNA at 0 h was set to "1". Means were calculated from three repeats, and error bars reflect  $\pm$ SDs. \*\*P < 0.01; \*P < 0.05.

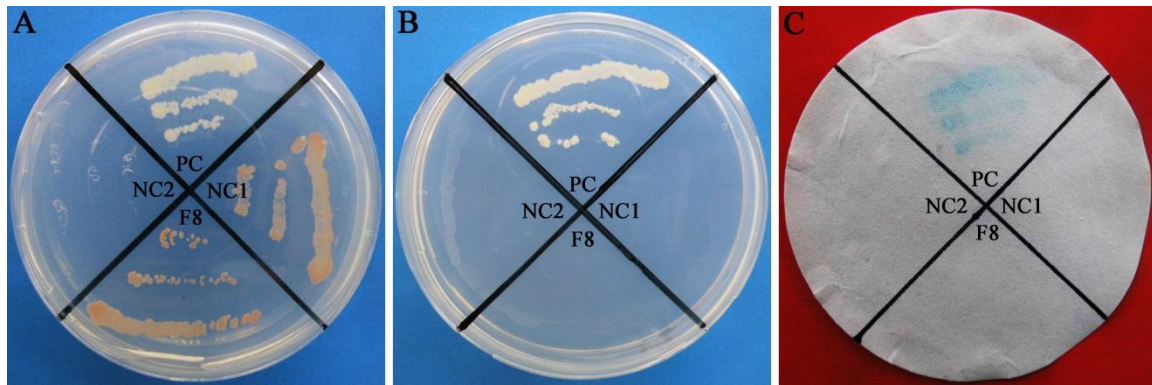

**Figure S3.** Transactivation assay of FtMYB8 in AH109 cells. (A-B) The transformed cells were selected on SD/-Trp and SD/-His-Trp media. (C)  $\beta$ -Galactosidase activity assay. PC: pBridge-*FtbHLLH2*; NC1: empty plasmid; NC2: AH109 cells; F8: pBridge-*FtMYB8*.

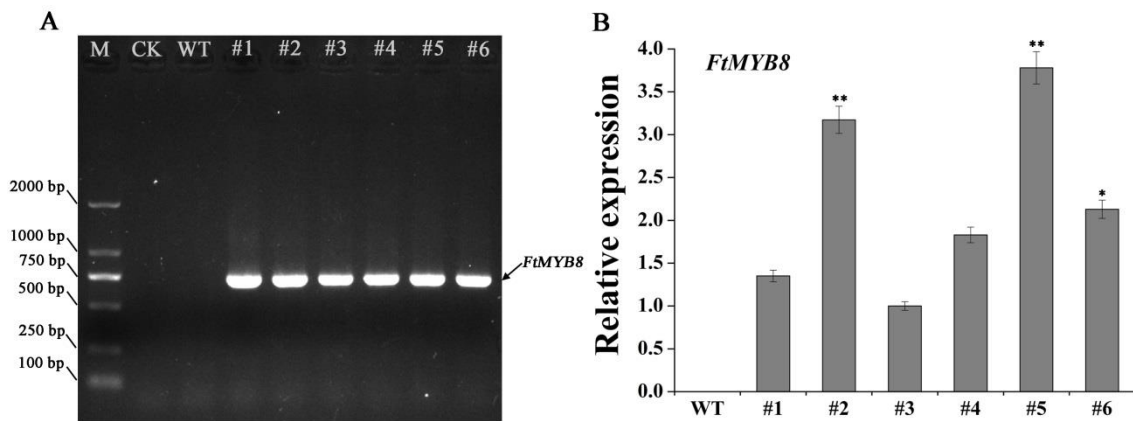

**Figure S4.** Generation of transgenic tobacco plants.

(A) PCR amplification of transgenic tobacco. Lane M, DNA marker 2000; lane CK, water, as a negative control; lane WT, wild-type tobacco; lanes #1 to #6, transgenic tobacco. (B) Detection of *FtMYB8* gene expression in transgenic tobacco and WT tobacco by qPCR. The tobacco  $\beta$ -actin gene served as an internal control. Error bars represent  $\pm$ SDs. \*\* $P < 0.01$ ; \* $P < 0.05$ .

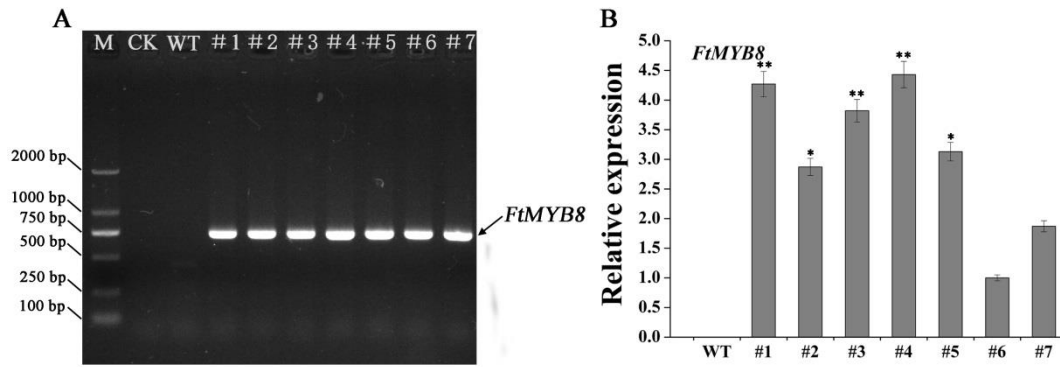

**Figure S5.** Generation of transgenic Arabidopsis plants.

(A) PCR amplification of transgenic Arabidopsis. Lane M, DNA marker 2000; lane WT, wild-type Arabidopsis; lane CK, water, as a negative control; lanes #1 to #7, transgenic Arabidopsis. (B) Detection of *FtMYB8* gene expression in transgenic Arabidopsis and WT Arabidopsis by qPCR. Arabidopsis *Atactin2* served as a reference gene. Error bars represent  $\pm$ SDs. \*\* $P < 0.01$ ; \* $P < 0.05$ .

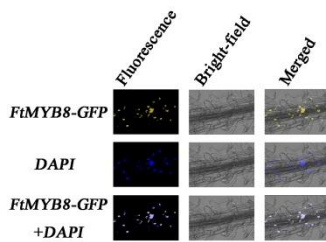

**Figure S6.** Subcellular localization of FtMYB8.

Root of *FtMYB8*-overexpressing Arabidopsis under a fluorescence microscope. DAPI was used as a nuclear localization marker.

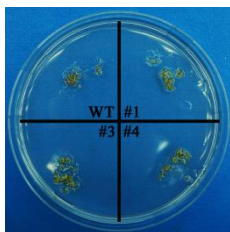

**Figure S7.** Seed germination of WT and transgenic lines.

WT and transgenic seeds germinated on MS medium; photos were taken after three days of germination.

**Table S1.** Sequence of the *P<sub>F1MYB8</sub>* promoter

| Gene                      | Sequence (5'→3')                                                                                                                                                                                                                                                                                                                                                                                                                                                                                                                                                                                                                                                                                                                                                                                                                                                                                                                                                                                                                                                                                                                                                                                                                                                                                                                                                                                                                                                                                                                                                                                                                                                                                                                                                                                                                                                                                                                                                                                                                                                                                                                                                                                                                                                                                                                                                                                                                                                                                                                                  |
|---------------------------|---------------------------------------------------------------------------------------------------------------------------------------------------------------------------------------------------------------------------------------------------------------------------------------------------------------------------------------------------------------------------------------------------------------------------------------------------------------------------------------------------------------------------------------------------------------------------------------------------------------------------------------------------------------------------------------------------------------------------------------------------------------------------------------------------------------------------------------------------------------------------------------------------------------------------------------------------------------------------------------------------------------------------------------------------------------------------------------------------------------------------------------------------------------------------------------------------------------------------------------------------------------------------------------------------------------------------------------------------------------------------------------------------------------------------------------------------------------------------------------------------------------------------------------------------------------------------------------------------------------------------------------------------------------------------------------------------------------------------------------------------------------------------------------------------------------------------------------------------------------------------------------------------------------------------------------------------------------------------------------------------------------------------------------------------------------------------------------------------------------------------------------------------------------------------------------------------------------------------------------------------------------------------------------------------------------------------------------------------------------------------------------------------------------------------------------------------------------------------------------------------------------------------------------------------|
| <i>P<sub>F1MYB8</sub></i> | TAGGAAGGTATGACAGTTTGATTGGTTTATTTAGTTTTGCCTTCTAAATTTACACTTTATTCTAA<br>TTACTAGTTTACTTTAAAAACATATTGTATTTTACCTAAAAAGAACTTGATTTATCTATTACTCA<br>ATGAGTACGAACACAAAAAAGATATGAGTGGATGATGGATCAGATGAAAATTTTAGGGGAT<br>GGATCGAGTGATGTGAGTGGTTTATCCCCGTCAATCGACCCGTTGCCGACCTATATAAGATT<br>AAGCTAATACATCATAGCTAATTATATCCTTGTCATTTGTAAGCTTGAATGCAAGATGCATAG<br>AGGTTATGAAAGCTTGTGGGCGTTCAATCAACATTATAGTTTAAGGTTTTTATATGTGGTAATC<br>TCTTATTGAATAACATATTTTATCAGGTGTCATTTCTATTAATCAAAGTTAAATTAATATTTTT<br>CTTTCAAAAAATACAAATATAAACTTATTGAAGGTAGGCTCATATTAATAACAACCTCAATTTGA<br>AAGTCAATCAACAAAATCCCTAACTTGGTTGAACTTACACCAATAAAAGTTACCATTAGAAA<br>TGTGGAAATATACATTTTAAAACTACAAAATTTGGAAAAAAAACCATAAAATAATCTAAA<br>AATGGATTAAGTGAAATCCAAGTTCAATAAATGTTTGTTCATATATATACTTTTCTGACATTGCA<br>TTAGTATAGTTGTTAAATTAGAAATGTTATTGTCACATAAATTTCTAACTGACAACGATGTC<br>TCCTTTTATTTAATATTGAAAAACGTTTAAAGGAAATAAAAATACTTTTTATTATTTAAAAAAA<br>TGTTTCATAGAGCATGGTAGGTTGTGCGGGTAAGTAAGAATGGCGGGATCTGCATGCGGAGGC<br>AAAAAGAAAACGACTGCTACTTAACGGTGTCAATCCCTTCACGGTAAACAACCAGTCAGCG<br>TTGTACGTTTTACGGAATCAATGCACCATTCTAACGGACTTAACCAAATAGTTTAAACAAAAC<br>CAACTAACCAAAGGTTAAATTTGTAAACGGATTTTTTTTTTAAAAAATCATCAAATATTCAATTA<br>TTAACAGATTACTACATACAGTTATAAGTTATAACTTAGACAGATAACAAGTTGTGCTGTCCTT<br>ACATGTCCATCATTATTAATATTAATATAAGTTAGTTGTCATATAAATTTGGCTAAAGATATTATTT<br>TGTGGAAACAATCTAATATTAATAATGAATATTATAAACAATTTGATGGGTTAATTTTTCTATT<br>TTCAATTGGTTTTAGTATAAAAATTTTTTTGAACATACGATGTACTTTTATCACATGATATGTTT<br>GAAATCGGACCTACCATAATTTAAAGATCTATTTTTTCATTGTAAAGTCAAACCTTAAAAAGTCT<br>TCACAAAGAAATGTATTTTTTTAATTATATTATTTTTCTTTTAAACTGAGATGCTAAATAAAC<br>ATTTTTTTTCTTCATAATTTTCAGTTCTAGTTTTTAAAGCCTAAAACCTGAAAAGATAGTAAGT<br>AGTGCCTCATCCGGAATGAGTACATGTTTTGTTTGATCATTTTCATCTAGTTTAGAATTTAAT<br>CTAGTTGGTGCCGAGCTAAAGTTTTTCCAGCTTCTAAATGTGTTTATAATCGACTTATTTAGTC<br>AAGTGAATGGGTACAAGCTAATTTTTTTTACGAGTTGATCTCAAATAGGCTGATTCATCACTA<br>CCGATTGAATATTGACTTGTCTAGTCTTCTTAGGATTTCAAGAATGTTCTAGAACTACCCAA<br>ACTTTGGTATACTCGTGATTAGCTCGTTTGGAAATCGGGTTGATGTCACAAAGTTTAAATTTAA<br>CCGAACATACAAATAAATATATTTCATAATTCATCTTGTTTACTCAAGTGATCGTGTCCGAGTCT<br>GAATTGAGTTTTTCTTCGAGTTGAGCTCGGATAACTTGGTTTTTGGTAACAAATAGAACC<br>TGCGAGCATTCTATTGTACGTAATTGTAGAAGTCCTATGTTAGGTAAAGTGTCGAACAAGACA<br>TTACTATGCCGTATAGTATAATAAAGAAGTTCTTCAATTCCTGGCGCTATTTGCTTGCGTATG<br>CGTGACCCACCTAAATAGTCTCTCCTCAAACCGCCGGTCCAAGTCAACTCATCTTCGATACTC<br>TTTAAGTATTTCTTAAGAACTTGATTTTTATATATATGTGCAGCAGCTTCTGCCAGCTTTTAAACG<br>CCGTAATCTATCCCGTGATCGATTTTCTTCTTTTTGTTGTTTCTGATCGACTGAGCTTGCCGG<br>ATCAAACCTCGATAACGCGA |

**Table S2.** Predicted cis-elements of the *P<sub>F1MYB8</sub>* promoter

| Name of the element | Sequence   | Function of element                              | Number |
|---------------------|------------|--------------------------------------------------|--------|
| ABRE                | GCAACGTGTC | cis-acting element involved in the abscisic acid | 1      |

|                 |              |                                                                      |    |
|-----------------|--------------|----------------------------------------------------------------------|----|
|                 |              | responsiveness                                                       |    |
| AE-box          | AGAAACAA     | part of a module for light response                                  | 1  |
| ARE             | AAACCA       | cis-acting regulatory element essential for the anaerobic induction  | 6  |
| AT-rich element | ATAGAAATCAA  | binding site of AT-rich DNA binding protein (ATBP-1)                 | 1  |
| ATC-motif       | AGTAATCT     | part of a conserved DNA module involved in light responsiveness      | 1  |
| Box 4           | ATTAAT       | part of a conserved DNA module involved in light responsiveness      | 4  |
| CAAT-box        | CAAT         | common cis-acting element in promoter and enhancer regions           | 41 |
| CCAAT-box       | CAACGG       | MYBHv1 binding site                                                  | 1  |
| CGTCA-motif     | CGTCA        | cis-acting regulatory element involved in the MeJA-responsiveness    | 1  |
| GA-motif        | ATAGATAA     | part of a light responsive element                                   | 1  |
| GATT-motif      | CTCCTGATTAGC | part of a light responsive element                                   | 1  |
| GT1-motif       | GGTTAA       | light responsive element                                             | 4  |
| O2-site         | GATGACATGG   | cis-acting regulatory element involved in zein metabolism regulation | 1  |
| TATA-box        | TATA         | core promoter element around -30 of transcription start              | 60 |
| TCT-motif       | TCTTAC       | part of a light responsive element                                   | 1  |
| TGACG-motif     | TGACG        | cis-acting regulatory element involved in the MeJA-responsiveness    | 1  |
| circadian       | CAAAGATATC   | cis-acting regulatory element involved in circadian control          | 1  |

**Table S3.** cDNA sequences of *FtGL3*, *FtEGL3*, *FtTT8* and *FtTTG1* genes from Tartary buckwheat.

| Gene         | cDNA sequence (5'→3')                                                                                                                                                                                                                                           |
|--------------|-----------------------------------------------------------------------------------------------------------------------------------------------------------------------------------------------------------------------------------------------------------------|
| <i>FtGL3</i> | ATGGAGAAAGTTTCACAAAATCTAAGAAAACAGCTTGCAATTGCTGTAAGAAGCATTCAAT<br>GGAGTTACTCAATTTTCTGGTCAATTCCTCTTCTGAACAAGGTGTTTTGGAATGGAGTGAA<br>GGGTTTTACAATGGAGATATCAAAACAAGAAAACTATACAAGCTGTTGAATGGGATGTAG<br>ACCAAATGAGCTTGAAAAGAAGTGAACAATTAAGAGAGCTTTATGAATCTCTCTTAACTGT |

---

TGAAACTAACACTCAAACCTAGAAGACCTTCAGCTGCACTGATTCCTGAAGATCTTTCTGATA  
CTGAATGGTTTTATTTGGTTTTGTATGTCCTTCGCTTCAATCTCGGCCAAGGGTTACCCGGAA  
CAGCTTTACAAAATGGCGAGCCTATATGGCTATGCAATGCTCACCAAGCGGATAGCAGATTG  
TTCAGTCGCTCTTCTCGCTAAGAGTGCTTCAATTCAGACTGTAGTATGCTTTCTTTCTTA  
GGAGGCGTAGTTGAGCTCGGCGCTACCGATTTGGTTTTAGAGGATCATTATTGATCAAATA  
TGTTCAAGATTCTCTCTTGGTGACTGATTGCTCAGCACTTCCTCAGATACCCATTTAGTAAC  
ACAATGTGAAGAGTTGAGATTGGTAGAGTGTTTCGAATAACAGCTTGATTATCTAATGGAGG  
ATACTAAATCTATGATGACTGAAAATGTAAATGTGGATCTTATAGATGATGATTTGAGTAACT  
GTGTTTATACTTCCATGACATCCAATGATTGCATATCTCAGAGCCTCGGGTATCCTGAGGATC  
TCCTTACTCTTCCGAAGATTGAGAATGTATCCGAAATTCATCCTCAAACAGCACAGGAGAAT  
ACAGAAGATAGTTGTGTTATGAGAACTGAGTTAGATGATGTTTATTACAAGAATGTTCTTGG  
TAGTATATTCAATACTAGCCACAGTTTGATCAGGGACCGTTCATATCGTAATTTAACATGAA  
ATCATGTTTTCGGTAGCTGGAGAAAAGGCGTTGGCTCGTATAGCAATCCTAGATATGGTAACT  
CGCAAAGGATCTTGAAGAAGATACTTTTTGAAGTTCCTCGGATGCATAGTGTATCCTCGTCC  
GAGAATAATGTGGATGGTGACCGGATAAAAACCGATTTGTGGAAACCCGAAGCTGATGAGC  
TTGTCTCAAACCGGATGCTTGTTCGAGGAGGAGACGGGAGAGTGTGGATGATAGATTTTT  
CGAGTTAAAATCATTGATTCCTTCCATTGATAAGGTTGATAAGGTGTCTATACTTGATGACAC  
AATAAAGTACATGAAAGAGCTTGAGAGGAGAGTTGAAGAGCTTGAGGGAAGTCAAGATCA  
CAATGAATCCGGTGGAGGAAGAACACGTATGAAATATCAAGACGCGGCAGAAAGAACATC  
CGACAATTATAAAAACAACAAAGTCGGAATCAAGAGAAAAGCTGAGGAGGAAATTGATGA  
AGGGAAGTTAGAGAATAGTCTTGTATCAATAAGAGATAGTTCAACTAATACTAACCTATCCAT  
CAACATCATCCAAAAGATGTCTCGATTGACATAACATGTCCTTGGAAAGGAATGCTTGTAC  
TCGAGATCATAGATGCATTAACAAATCTACGACTAGATACTCACTCGGTTCAATCCTCAAGAT  
CCGATAACCTCCTATCCATAAACATCAAAGCAAAGATCAAAGTACCGGGCGGGTTATCCGCG  
GGAATGATCAGGCAAGTGTTACAAAGAGTCGTGATAAGAAGTTGA

*FiEGL3*

ATGGAAACTGGGCTCCAAAACCTAAGGAAGCAGCTTGCTCTTGCTGTTAGGAGCATCCAAT  
GGAGTTACTCCATTTTCTGGTCAACTTCTCCTTCTGAACTAGGGGTACTAGAATGGGGTGAA  
GGATACTACAATGGAGATATCAAGACAAGGAAAACAATTCAAGCTGGTGAATTTGATGTAG  
ACCAGATGGGCTTGCAAAGGAGTGAGCAGTTAAGGGAGCTTTATGAGTCTCTATTAGCTGG  
TGATAGCAACCCACAAGCTAGAAGGCCATCAGCTGCACTGTCTCCTGAAGACTTGTCGAAT  
ACCGAGTGGTATTACTTGGTTTTGTATGTCATTTGCCTTCAATCTTGGACAAGGGTTGCCGGG  
AAGAACTTTAGAGACCGGTCAGCCTATCTGGATCTGTAACGCCACCAGGCAGATAGTAGT  
GTGTTTGGCCGCTCTCTGCTGGCTAAGAGTGCTTCCATTCAGACAGTGGTATGCTTTCCCTT  
TCTAGGAGGTGTCGTCGAGCTAGGTGTCATGATATGGTTTTAGAGGATCTTCCAATGATTC  
AATATGTCCAAGCTTCTCTATTGGAGATTGATTGTCCTGCTGTTTTTAGTTATACTCGAACATC  
AGTTGTGCCATGTGAAGAAATGAGATCATTAGAGTCTCCTGATGACAGCTCTAGTGGATTTG  
GACTAATCAACCAGTAGACGAAACTAAATTCAGGTTGAATGTGCAAGTGGGGAGCTTAT  
AGATGATGATGACCTGAGTAACCGTGTTTATACTTCTATGACTGAAAGTGAATGTATATCACA  
GAATCTCATAAACCTGAGAATCCCATATCTCTTTTAAATGCTCAAGAACAGGATATTCAAGA  
TGAGTTCAGTGATGATCTCCATTACCGGAATATTCTCACTAGTCTTTTCAAGAGCACTAATGA  
GTTGATCTTGGAGCCTAGTGCTTGAATCGCGAAAACAAGTCATGTTTTGTGAGTTGGAGA  
AAAGGAGGCATAGGTTCTTGCTTTAGACATACAAATGGAAGCTCACAAAGAGTTTTAAGGA  
AAATACTATCTGAAGTTCCTCGGATGCATGATGGTTTTCTTAACCATACAATTGCAGAGAGA  
AGGAGAAGGGAGAGTGTCAATGACAGAATTTCTGCACTAAAATCACTTATCCCATCAATTG  
ATAAGGTTGACAAGGCTTCTATACTTGATGACACAATAAACTACTTGAAAAATCTCAAGAGA

---

---

AGAGTTGAAGATCTTGAAACAAGTGAATGCAGTGAAAGAAAAACATAAAAAGTCTCAA  
GACATGGCAGAGAGGACATCCGACAACACTACGGAAACAACAAAGATGGTGTCAAGAGAAA  
AGCCAATGAATCTGATGAAGGGATCAGACAAAATTCTAAGAACTCTACCAAACATCAATC  
AGCCTAATCGAGAAGGATGTTTTAATTGAGTTAAGATGTCCATGGAAGGAATGCATATTACT  
CGAGATCATAGATTGCTGAGTAGTCTCAGACTAGATACACATTCGGTTGAGTCTCTACAA  
CTAACAACTTTCTTTCTGTTACCATCAAAGCAAAGATCAATAGATTGAGCAGTCTATCAGCA  
GGAATGATCAAGCAGGTGCTACAGAGAGTTCTAATGAAAGCTTGA

*FtT8*

ATGGCGGCACCACCGCCAGGCAACGGGCGGCTGCAGACGATGTTGCAGTCGGCGGTTCAA  
GCCGTTCAAGTGGACCTACAGTCTCTTCTGGCAATTCTGCCCCAGCAAGGGGTTCTAGTGT  
GGTCAGACGGATACTACAATGGAGCAATAAAGACTCGGAAAACGGTCCAGCCGATGGAGG  
TGAGTGCCGAGGAAGCTTCCTTGCAACGCAGCCAGCAACTGCGCGAGCTTTACGACTCTCT  
CTCAGCCGGAGACACTAACCAACCGGCAAGGCGTCCCTCTGCCGCTCTCTCACCGGAGGA  
CTTAACGGAGACCGAGTGGTTCTACCTTATGTGTGTCTCCTTCTTTCCCTCTGGTGTGG  
GTTACCCGGTAAGGCATACGTAACGACAACATGTATGGCTAACGGGCGCACACGAGGTT  
GATAGCAAAGTCTTTTCTCGAGCTATTCTTGCTAAGAGCGCTCGGGTTCAGACGGTTGTGTG  
TATTCCTCTGTTGGATGGAGTGTGGAGTTGGGCTCTACTGAGAGGTTGCCGGAGGACATAT  
CTGTTGTCCAACCTCGCAAGACGTTCTTCGTTGACCACCCTCACCACTCCACCGCCTTCC  
ACCGCCAAACCGGCGTATCTGAGCATTCCACCTCCAACCCAGCTGCCTCATCTCCGAC  
CACCTGCCACCCGCTTCCACTCTCCCCTATCCCAGCTGCCTCCATGTATCCTGCCACTGAT  
CCTGCGACCACCTCCAATATGCACCGAGTCAACGAGGAGGCCGAGGATGACGATGAAGAA  
GACGACAACGAATCGGATTCAGAGGCGGAAACCGGCAGAAATAGCCGATCCATGTCGGGA  
GCAGGGCAACAAAACCCGCAAAATCCGGCTCAGTTGGGAGCTGGTGCCTCGGCAAACACG  
GCGACTGCTGAGCCCAGTGAGCTAATGCAGCTTGAGATGTCAGAGGATATCCGCCTCGGCT  
CACCGGAAGATGCCTCCAACAACATGGATCCCGATTTCCGGCGACGGGTGCGGTAGCCGG  
AATTAATATCCCGGCAAACGCGATTGTGGGTCAACAGAGAAGGGCCGACTCGTTCAGCAGG  
GCTGAGTCATCTAGGCGTTGGCCGGTCATACAACATGATTCGTTGCATCAACAACCACCTCT  
TCCACCGCCGCAACCACCGCCTTCCCTCAGGTACCACCCATTGGAAGAATCAGCCGCAGAG  
GACACACACTACTCTCAAACAGTCTCAACCATTCTACAATACCAGGCCGGACGGTGGTTCGG  
AGCCCACCCACCACCCCAAACGGACCCAGCTACCTCAGCCTCAACACCCACACTCCG  
CCTTCGCAAATGGCCGCTCGATCCGACCACCAAGTCCACATCCCAGAAGAGCTCAACTC  
CCAATGGCTCCTCAAATACATCCTATTACCGTCCCATTCTCCACACCAGTAAATCCAACG  
ACGAAAACCTCACCTAAAAGCCGAGAGCCTGGGGCTGACCAGTCTCTCGGCTCCGAGTCA  
AGGGCACCCCGCAAGACGAGCTCAGCGCTAACCATGTCTTAGCTGAACGAAGGCGTCGAG  
AGAAGCTCAACGAGAGGTTTCATCATACTAAGGTCGTTGGTTCCCTTTGTAACGAAAATGGAT  
AAAGCTTCGATTTTAGGTGATACGATCGAGTACGTGAAGCAACTTCGTAGAAAAATACAAG  
ACTTGAAACGCGCGCAGGACAACCTGGAGACCGAGCATAACGCTCTTGTGACGCTGCTA  
AGTCAAACAACCTCAAGCGGGCTCACAGTGTCCGAGCGGGCTCGGGTGGACTCGGGTTCGA  
GCGTGGATAAGAGGAAGATTAGGGTGGTGGAGGGGAGTAGTGGAGGTGCTAAGGCTAAGA  
TGATTGAGTCATCACCGCCACCACTTCCACCACCATCTCAGGCAGACATGTTACAGGTGTGCG  
ATAATCGAGTGTGATGCTTTAATAGAGCTGCACTGTCCGTACAGAGAAGGGTTGCTTCTTGA  
TGTGATGCTTGTGCTCAGGGAGTTGCGCATCGAGGTGACCGCAGTTCAATCTTCTTTGAATA  
ATAATGGCTTCTTCGTAGCTGAAATGAGAGCTAAGGTGAAGGAGAATGAAAATGTGAAGAA  
AGCGAGTATTGTTGAAGTGAAGAGAGCAATAAATCAGATAGTTCGCACTCTGATGACTTCT  
AG

*FtTG1*

ATGGAGAATTCGACTCAGGAATCACACCTCCGGCATGAGAATCTGGTGACGTACGAGTCCC

---

CGTACCTCTGTACGCTATGTCGTTCCGCCAGCGGGCGGACACTTCCAGCGTCGGGGCGGCCG  
AACACACGTCGCCGTCCGCAGCTTCATTGAGGAGTACAACAACAAGGTCGACATCCTCACC  
TTCGATGACGAAACCCTAACCCCTAACCCCAATCCATCTCTTTCCCTTCCCACCCTTATCCT  
CCAACCAAGCTCATGTTTCGTCCCAATCCTCCACTCCTTCTTCTTCGGCTCTCCTAGCCTCC  
TCCGCTGACTTCCCTCCGCTCTACAGCCTCCGTAGCGGGCGGCAAGCAGTCGATCAAGTCG  
CCGTCCTCAATAACTCCAAATCCAGCGAGTTCTGCGCCCCTCTCACCTCCTTCGACTGGAAC  
GACCTCGTTCCGTCTCGTATCGGGACTTCAAGCATCGACACAACCTGCACGATCTGGGATAT  
CGAGAAGGAGGCTGTGGAGACGCAGCTGATCGCGCACGACAAGGAGGTCTACGACATCGC  
CTGGGGGGAAGCCGGCGTCTTCGCCTCCGTCTCGGCCGATGGAAGTGTTCGCATCTTCGAT  
CTCCGTGACAAGGAGCATTCCACCATCATCTACGAGTCTCCGGAGCCGGACACCCGCGTTC  
TCAGACTAGCCTGGAACAAGCAGGATCTCAGGTACATGGCTACGATCCTGATGGATAGCAA  
CAAAGTGGTAATACTCGACATCCGCGTTCCTACTATGCCTGTTGCGGAGCTTGAGAGACATG  
GCGCTAGCGTCAACGCCATAGCCTGGGCTCCTCAGAGCTCCAGGCATATCTGCTCTGCCGG  
AGATGACGCCCAGGCACTCATCTGGGAGCTTCTACCGTGGCTGGCCCCGCTGGAATCGAT  
CCTCTATCTTGTACTCTGCTGCCTCCGAGATTAATCAGTTGCAGTGGTCTGCAACGCAGCC  
TGACTGGATTTCCATCGCCTTTGCCAATAAATTGCAGATGCTGAAAGTTTAA

**Table S4.** Sequences of all primers used in this study

| Primer name        | Forward primer (5'→3')                       | Reverse primer (5'→3')                          |
|--------------------|----------------------------------------------|-------------------------------------------------|
| <i>FtMYB8</i>      | ATGAGGAAGCCGTGTTGCGAGA                       | TCATCTGAATAGGTTAAGAGTAGGA                       |
| <i>PfMYB8</i>      | TAGGAAGGTATGACAGTTTGATTG                     | TGCTTGACCAAGCTCCCTTG                            |
| <i>PBG-FtMYB8</i>  | TGACTGTATCGCCGGAATTCATGAG<br>GAAGCCGTGTTGCGA | TAGCTTGGCTGCAGGTCGACTCATCT<br>GAATAGGTTAAGAGTAG |
| <i>PYFP-FtMYB8</i> | GACGAGCTCGGTACCATGAGGAAG<br>CCGTGTTGCGAG     | GCTCACCATGTGACTCTGAATAGGTT<br>AAGAGTAGG         |
| <i>PBI-PfMYB8</i>  | TGATTACGCCAAGCTTTAGGAAGG<br>TATGACAGTTTGATTG | ATCCTCTAGAGTCGACTCGCGTTATCG<br>AGTTTGATCCGGC    |
| <i>PGAD-FtMYB8</i> | TGAATTCACCCGGT<br>ATGAGGAAGCCGTGTTGCGAGA     | GAGCTCGATGGATCC<br>TCATCTGAATAGGTTAAGAGTAG      |
| <i>PGBK-AiTT8</i>  | ATGGAGGCCGAATTCATGGATGAA<br>TCAAGTATTATTC    | CCGCTGCAGGTCGACCTATAGATTAGT<br>ATCATGTATT       |
| <i>PGBK-AiGL3</i>  | ATGGAGGCCGAATTCATGGCTACC<br>GGACAAAACAG      | CCGCTGCAGGTCGACTCAACAGATCC<br>ATGCAACCC         |
| <i>PGBK-AiEGL3</i> | ATGGAGGCCGAATTCATGGCAACC<br>GGAGAAAACAG      | CCGCTGCAGGTCGACTTAACATATCCA<br>TGCAACCC         |
| <i>PGBK-AiTTG1</i> | ATGGAGGCCGAATTCATGGATAATT                    | CCGCTGCAGGTCGACTCAAACCTCTAA                     |



---

|                             |                          |                             |
|-----------------------------|--------------------------|-----------------------------|
|                             | CAGCTCCAGA               | GGAGCTGCA                   |
| <i>PGBK-FtTT8</i>           | ATGGAGGCCGAATTCATGGCGGCA | CCGCTGCAGGTTCGACCTAGAAGTCAT |
|                             | CCACCGCCAGG              | CAGAGTGCG                   |
| <i>PGBK-FtGL3</i>           | ATGGAGGCCGAATTCATGGAGAAA | CCGCTGCAGGTTCGACTCAACTTCTTA |
|                             | GTTTCACAAAATC            | TCACGACTCTT                 |
| <i>PGBK-FtEGL3</i>          | ATGGAGGCCGAATTCATGGAAACT | CCGCTGCAGGTTCGACTCAAGCTTTCA |
|                             | GGGCTCCAAAA              | TTAGAACTCTC                 |
| <i>PGBK-FtTTG1</i>          | ATGGAGGCCGAATTCATGGAGAAT | CCGCTGCAGGTTCGACTTAAACTTTCA |
|                             | TCGACTCAGGA              | GCATCTGCA                   |
| <i>FtH3</i>                 | AATTCGCAAGTACCAGAAG      | CCAACAAGGTATGCCTCAGC        |
| <i>qFtMYB8</i>              | TTGATTGCGGGGAGGTTACC     | TCGGTTATCTGCGAGACGTG        |
| <i>qFtPinG0505906200.01</i> | GCGTTCTATTCCTAAAGCTGCC   | CTTCCCGCAATCAAAGACCA        |
| <i>qFtPinG0606379100.01</i> | AAGCATGGAGAGGGGTGTTG     | TCCGTTCTTCCTGGTAGCCT        |
| <i>qFtPinG0100390100.01</i> | TCACAAACTCCTCGGGCTCA     | TGGCATGGCAATGGTTAGATC       |
| <i>AtActin2</i>             | CTGGAATGGTGAAGGCTGGTT    | CGATTGGATACTTCAGAGTGAGGAT   |
| <i>Ntβ-actin</i>            | TATCCAGAAAGAGTCAACCCGTCA | TAGACAAAGCACATCACGACCACAA   |
|                             | CCT                      | CC                          |
| <i>GUS</i>                  | ATGCGGACTTACGTGGCAAAGGAT | GCCGACAGCAGCAGTTTCATCAATCA  |
|                             | TCGA                     | CC                          |
| <i>NtCHS</i>                | ACAAGACATAGTGGTGGTTGAAGT | GAGCCCGAGTAGCTTAGTGAGTTGGT  |
|                             | GCC                      | AG                          |
| <i>NtCHI</i>                | GTGCTCTTCCTTTTCTCGCCGC   | ATTTTCTGCCACCTTCTCTGAGTATTG |
| <i>NtF3'H</i>               | GGTGGTTGTGGCGTCTGCGTCG   | AAGCCTTGGCAGAGAAAAGATGAAC   |
|                             |                          | AGA                         |
| <i>NtFLS</i>                | ACAGGCAATAGCGTCAATAACAA  | GCTAGCATCCGATATGAGTTTCACTA  |
|                             | AATG                     | CA                          |
| <i>NtDFR</i>                | GCTAAAGCAAACACAGTGAAGAG  | CATCCATCCTGTCATCTTCTTAGCAT  |
|                             | GC                       | A                           |
| <i>NtANS</i>                | AGTATGCTAATGACCAACCCTCTG | TTGTAACCCAGGCACCATATTGTG    |
| <i>AtCHS</i>                | ACGGACATTTGAGGGAAGTTGG   | AGGGTGGGCTATCCAGAAGAGG      |

---

---

|                |                                  |                            |
|----------------|----------------------------------|----------------------------|
| <i>AtCHI</i>   | GCGGTTCTGGAATCTATCATCG           | TCGTCCTTGTTCCTTCATCATTAGC  |
| <i>AtF3'H</i>  | TCGTGGTCGCCGCTTCTAA              | ATCGGTGTCCGTAAGGTGCA       |
| <i>AtFLS</i>   | ACCGTTTGCTTTCAAGGATTACAGT<br>TAC | AAATGATCACCGATTTTTTTTCCGTG |
| <i>AtDFR</i>   | GCCAAACGCCAAGACGCTA              | CATTCACTGTCGGCTTTATCACTTC  |
| <i>AtANS</i>   | AGGTTAGGATTTCTTGGGCTGTG          | CCGTGGAGGAAACTTAGCCG       |
| <i>AtBAN</i>   | GCACGGGAAACTTAGCCTCT             | GATCGGAGTTGCGACATGGA       |
| <i>AtTT12</i>  | TGGTACTCGGGTCCAATCCT             | CCAAGCAAGCCGAAATCCAG       |
| <i>AtTT19</i>  | CATCTTCTTCGTCAGCCATTTGGT         | CGTCACATTTCTCGCCTAACCT     |
| <i>AtAHA10</i> | CCGAGGATTTGGACAAGCCA             | GACCTAGACTTTGACTATTAGC     |

---
